# Supplementary material for: Integrated exploration of experimentation and molecular simulation in ester-containing polyimide dielectrics
Source: Royal Society of Chemistry journal article supplement (doi:10.1039/d2ra06376j), 2023-01-01
Supplement: d2ra06376j1.pdf [file d2ra06376j1.pdf]

## **Integrated Exploration of Experimentation and Molecular Simulation in Ester-containing Polyimide Dielectrics**

Jinpeng Luo<sup>a,b</sup>, Hui Tong<sup>b,\*</sup>, Song Mo<sup>c</sup>, Fei Zhou<sup>a</sup>, Song Zuo<sup>a</sup>, Chuanqiang Yin<sup>a</sup>, Ju Xu<sup>b,d</sup>, Xiaomin Li<sup>a,\*</sup>

<sup>a</sup> Institute of Photovoltaics, Nanchang University, Nanchang, 330031, China;

<sup>b</sup> Department of Micro-nano Processing and Intelligent Electrical Equipment, Institute of Electrical Engineering, Chinese Academy of Sciences, Beijing, 100190, China;

<sup>c</sup> Key Laboratory of Science and Technology on High-tech Polymer Materials, Institute of Chemistry, Chinese academy of Sciences, Beijing, 100190, China

<sup>d</sup> School of Engineering Science, University of Chinese Academy of Sciences, Beijing, 100049, China

\*Corresponding authors

Email: tonghui@mail.iee.ac.cn (Hui Tong)

Email: lixiaomin@ncu.edu.cn (Xiaomin Li)

## Snapshots of molecular simulation process of EPI-1 (Figure S1 ~ Figure S4)

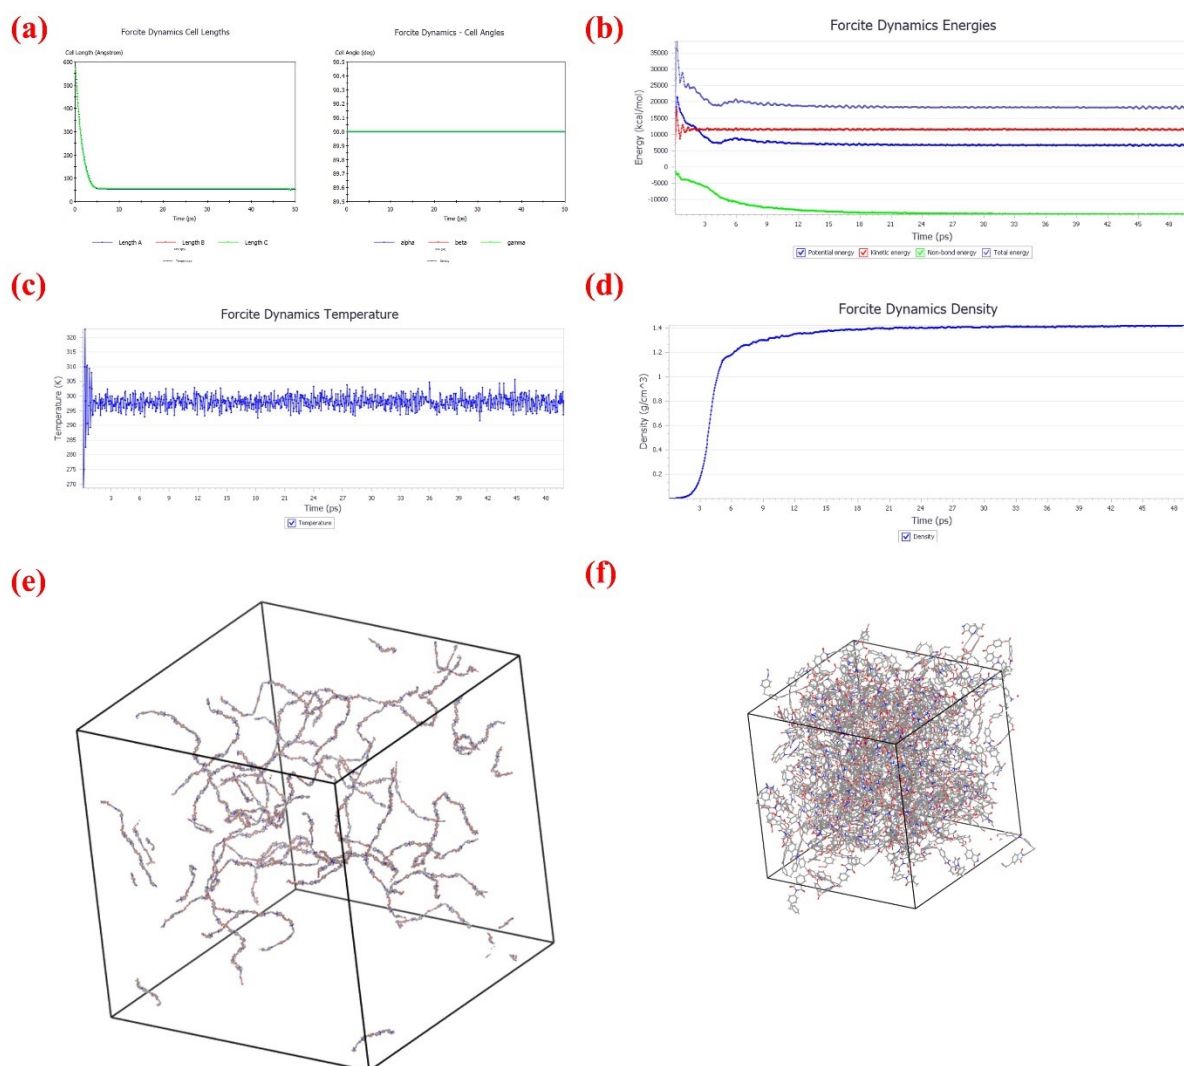

**Figure S1** The compress process (NPT: 0.5 GPa, 50 ps) of EPI-1: (a) The cell lengths and angles (b) the dynamics energies (c) the dynamics temperature and (d) the dynamics density as functions of time, respectively; (e) The initial frame (the size of cube:  $a=b=c=274.158 \text{ \AA}$ ); (f) The end frame (the size of cube:  $a=b=c=52.8615 \text{ \AA}$  with a properly amplification).

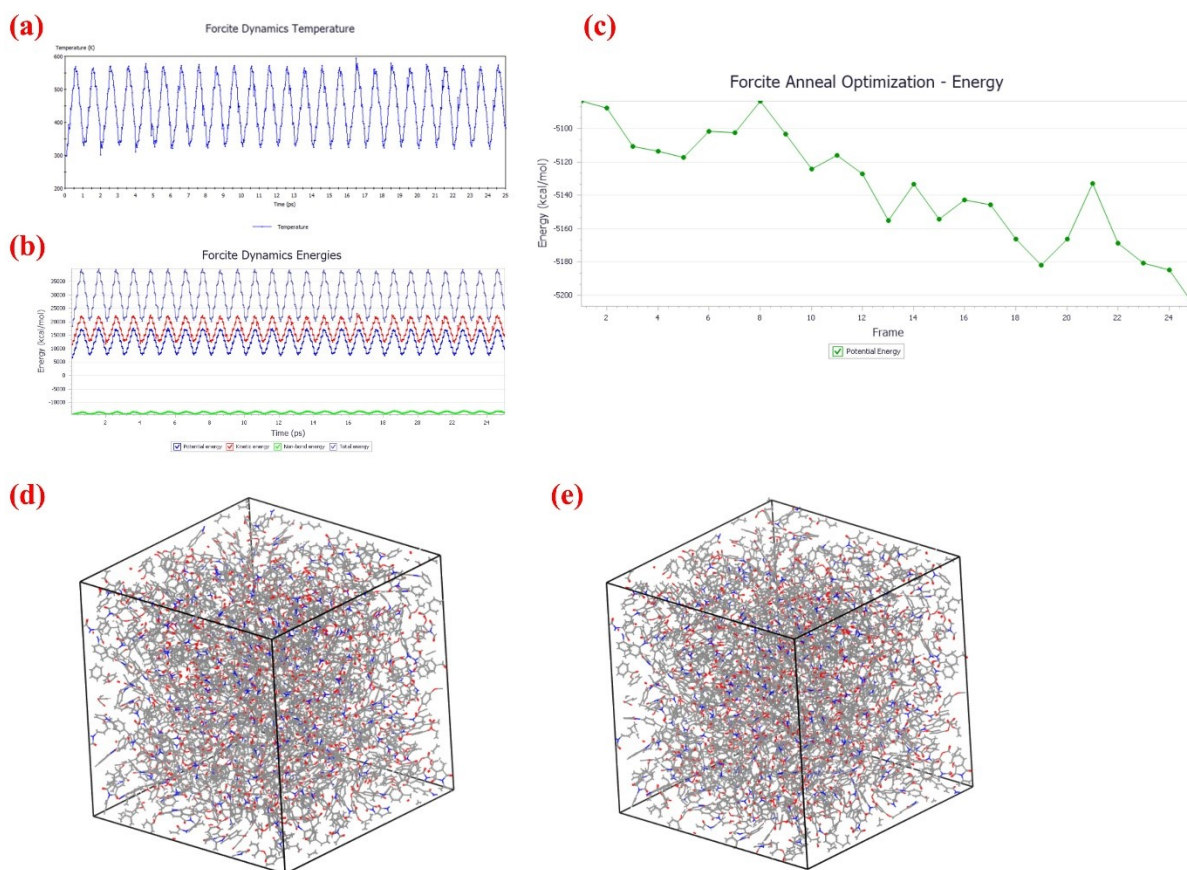

**Figure S2** The annealing process (NVT: 298 - 598 K, repeat 25 times) of EPI-1: (a) The dynamics temperature and (b) the dynamics density as functions of time, respectively; (c) The energies of 25 optimizations after the annealing process; (d) The initial frame (the size of cube:  $a=b=c=52.8615 \text{ \AA}$ ); (e) The frame with the lowest energy (the size of cube:  $a=b=c=52.8615 \text{ \AA}$ ).

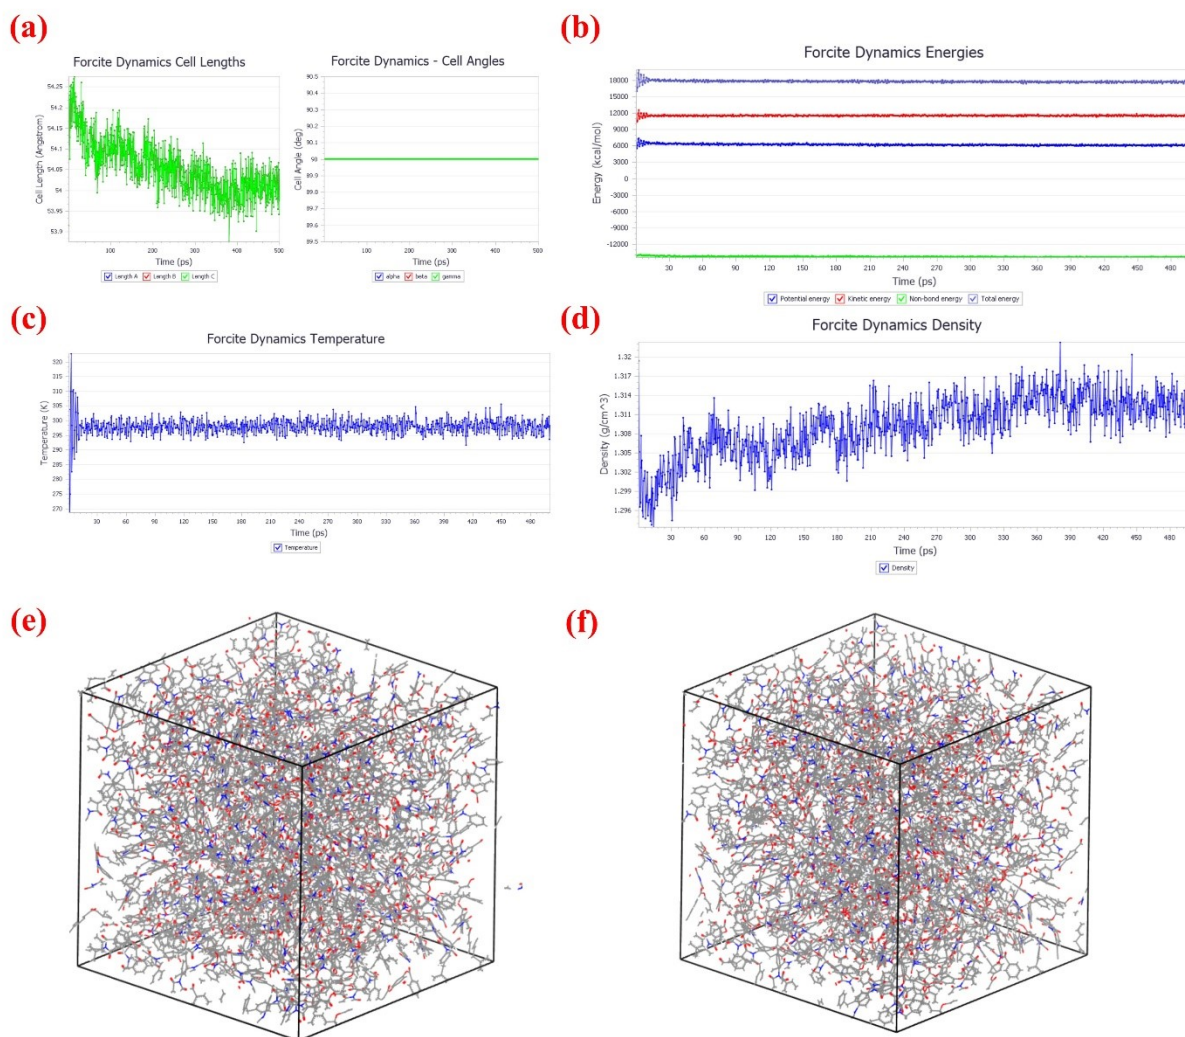

**Figure S3** The release process (NPT: 10<sup>-4</sup> GPa, 500 ps) of EPI-1: (a) The cell lengths and angles (b) the dynamics energies (c) the dynamics temperature changing with time and (d) the dynamics density as functions of time, respectively; (e) The initial frame (the size of cube: a=b=c=52.8615 Å); (f) The end frame (the size of cube: a=b=c=54.3257 Å).

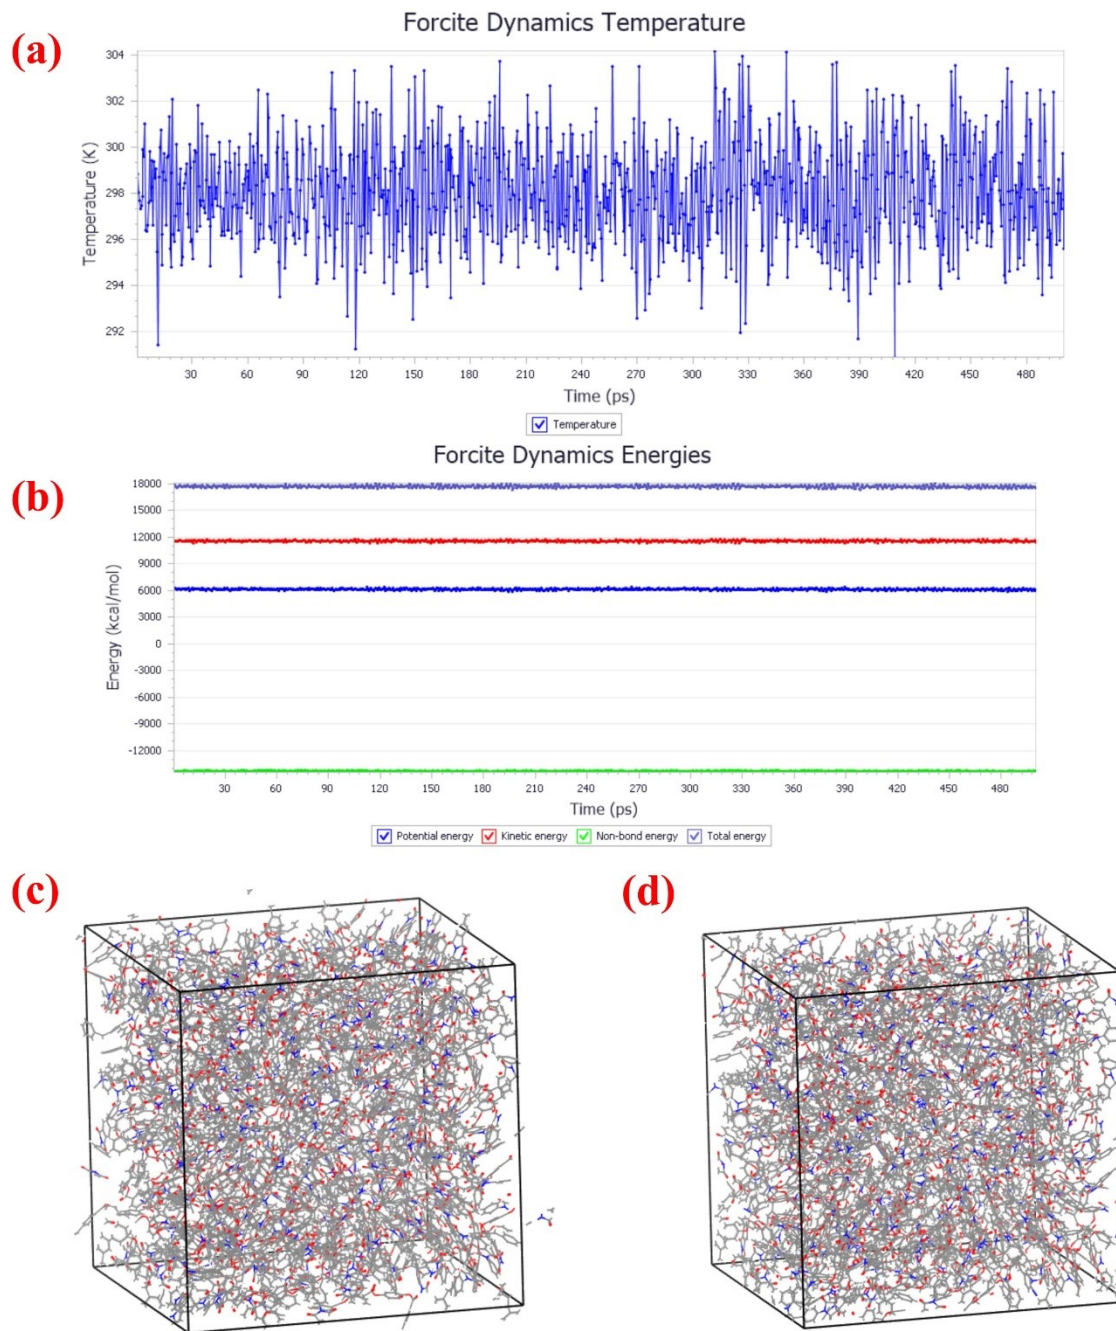

**Figure S4** The equilibrium process (NVT, 500 ps) of EPI-1: (a) The dynamics temperature and (b) the dynamics energies as functions of time, respectively; (c) The initial frame (the size of cube:  $a=b=c=52.8615 \text{ \AA}$ ); (d) The end frame (the size of cube:  $a=b=c=52.8615 \text{ \AA}$ ).

## Snapshots of molecular simulation process of EPI-2 (Figure S5 ~ Figure S8)

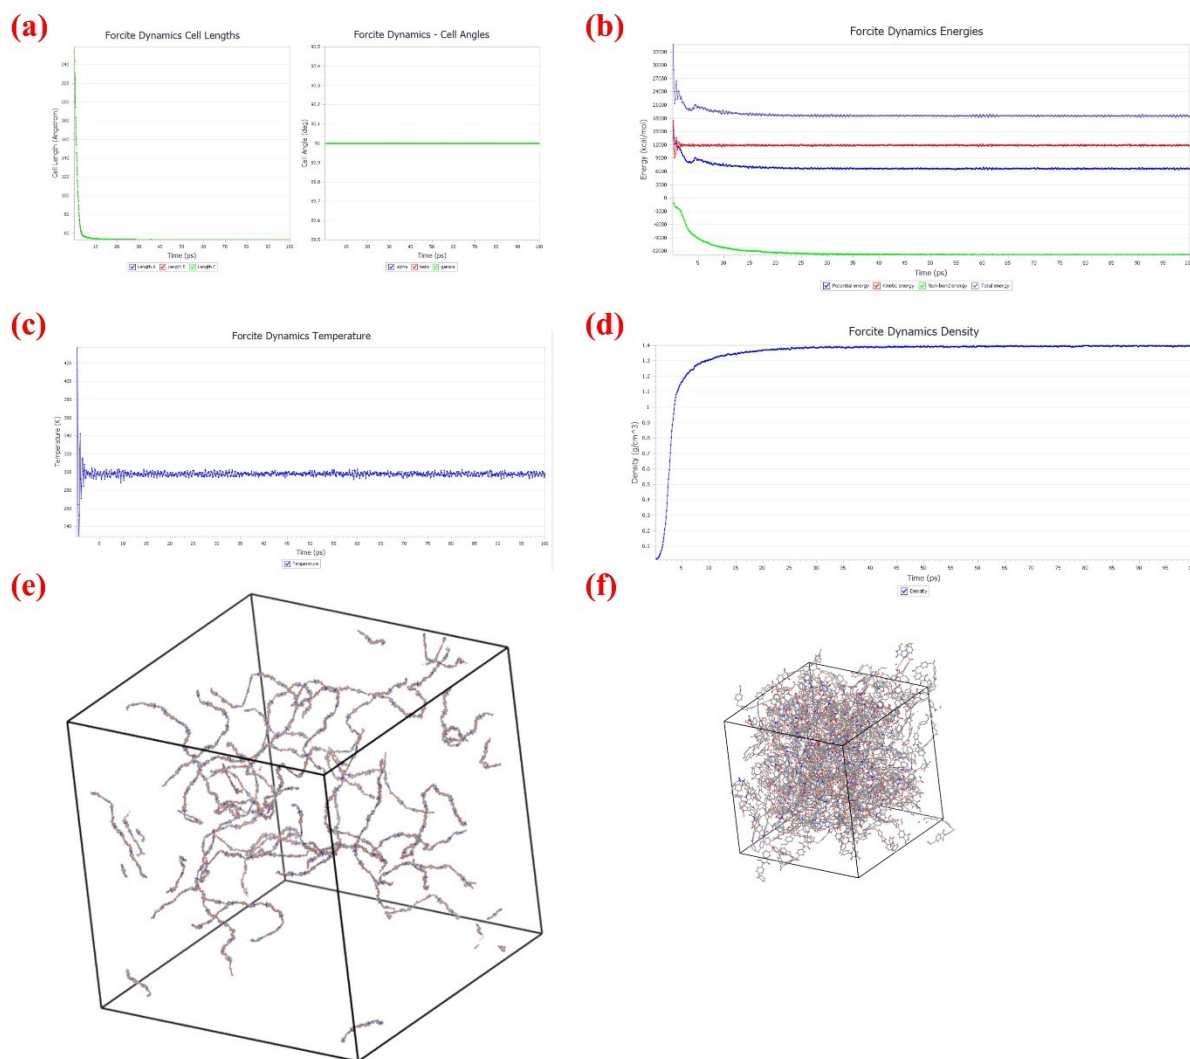

**Figure S5** The compress process (NPT: 0.5 GPa, 50 ps) of EPI-2: (a) The cell lengths (b) the dynamics energies (c) the dynamics temperature and (d) the dynamics density as functions of time, respectively; (e) The initial frame (the size of cube:  $a=b=c=274.158 \text{ \AA}$ ); (f) The end frame (the size of cube:  $a=b=c=52.6450 \text{ \AA}$ , with a properly amplification).

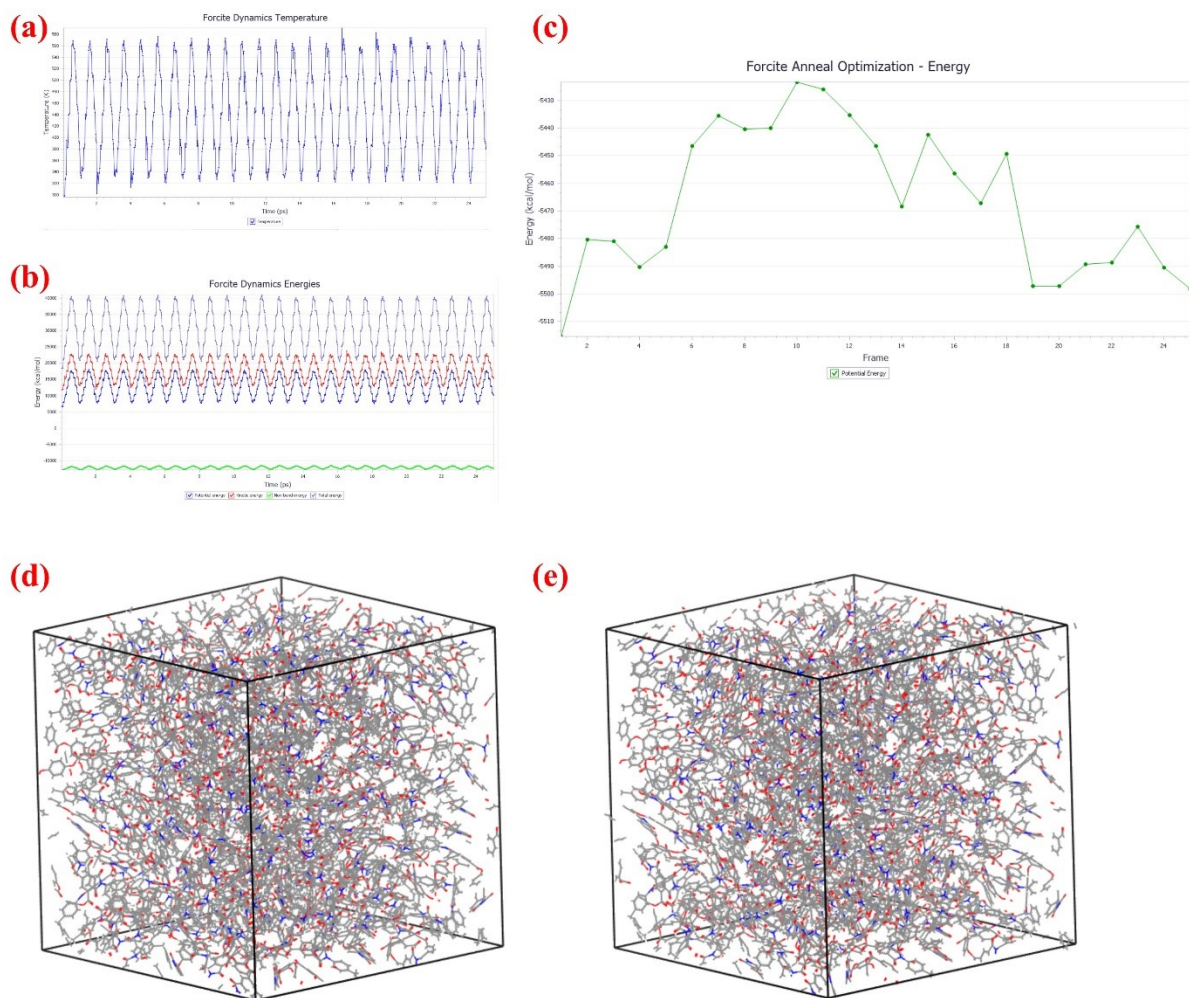

**Figure S6** The annealing process (NVT: 298 - 598 K, repeat 25 times) of EPI-2: (a) The dynamics temperature and (b) the dynamics density as functions of time, respectively; (c) The energies of 25 optimizations after annealing process; (d) The initial frame (the size of cube:  $a=b=c=52.6450 \text{ \AA}$ ); (e) The frame with the lowest energy (the size of cube:  $a=b=c=52.6450 \text{ \AA}$ ).

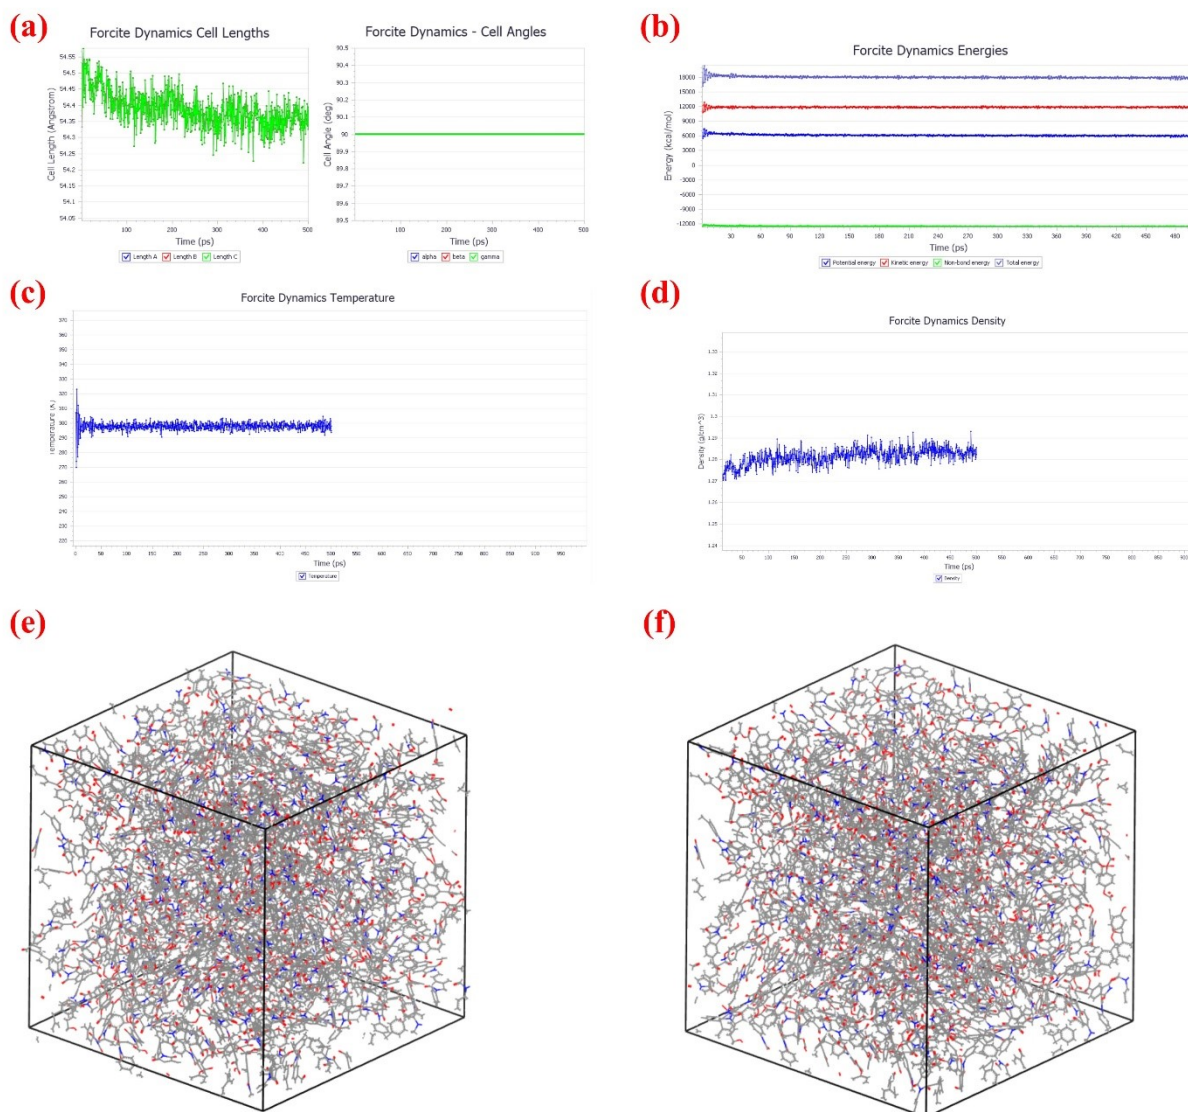

**Figure S7** The release process (NPT:  $10^{-4}$  GPa, 500 ps) of EPI-2: (a) The cell lengths and angles (b) the dynamics energies (c) the dynamics temperature and (d) the dynamics density as functions of time, respectively; (e) The initial frame (the size of cube:  $a=b=c=52.6450$  Å); (f) The end frame (the size of cube:  $a=b=c=53.0987$  Å).



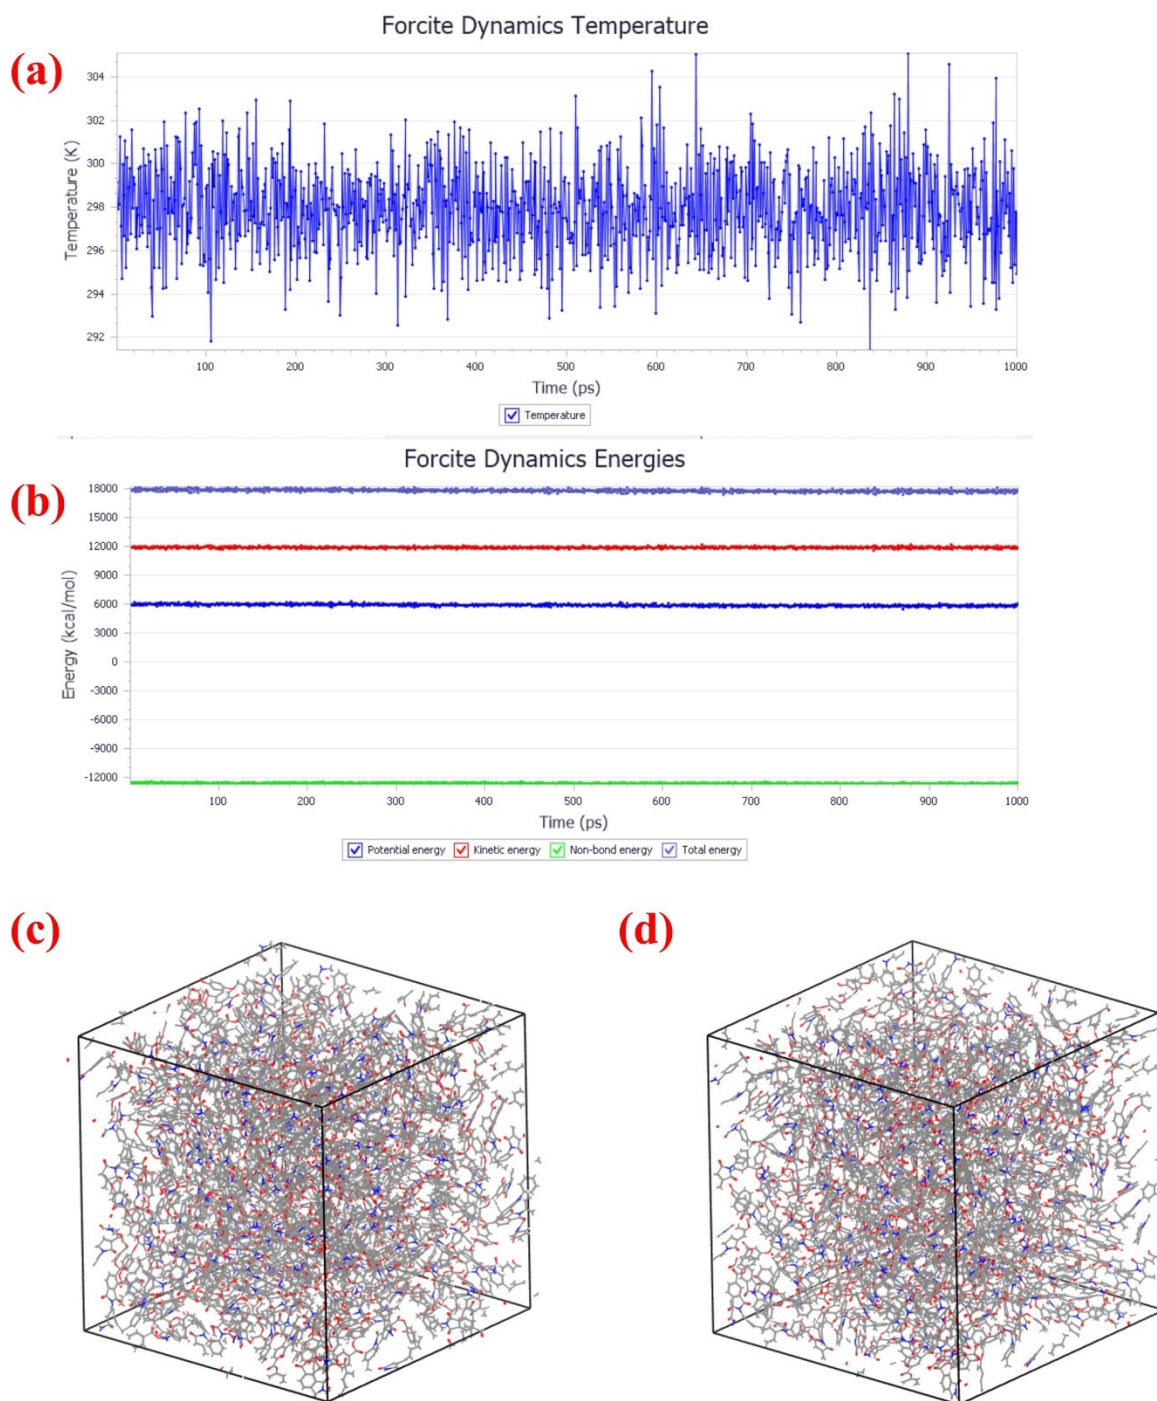

**Figure S8** The equilibrium process (NVT, 1000 ps) of EPI-2: (a) The dynamics temperature and (b) the dynamics energies as functions of time, respectively; (c) The initial frame (the size of cube:  $a=b=c=53.0987 \text{ \AA}$ ); (d) The end frame (the size of cube:  $a=b=c=53.0987 \text{ \AA}$ ).

## Snapshots of molecular simulation process of EPI-3 (Figure S9 ~ Figure S12)

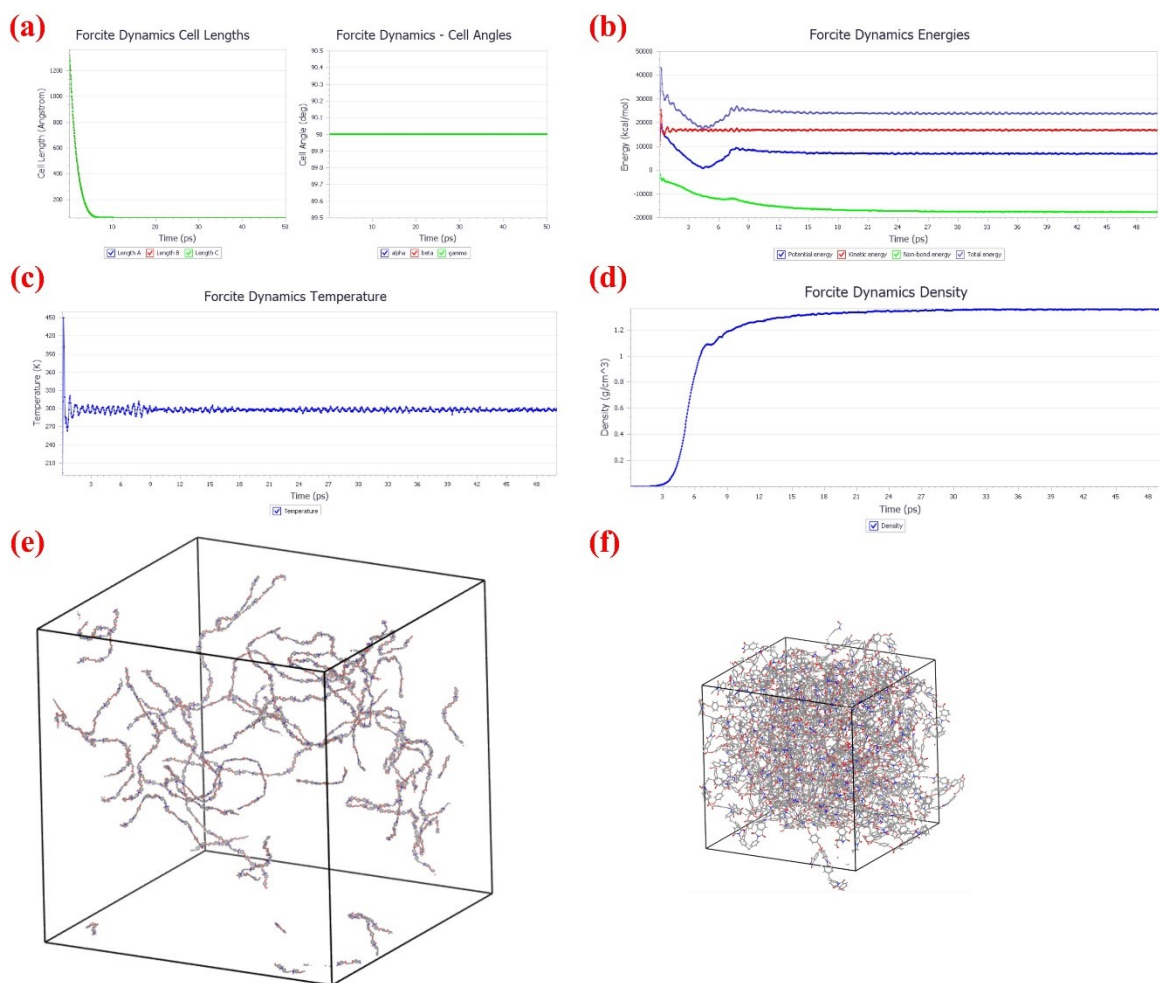

**Figure S9** The compress process (NPT: 0.5 GPa, 50 ps) of EPI-3: (a) The cell lengths and angles (b) the dynamics energies (c) the dynamics temperature and (d) the dynamics density as functions of time, respectively; (e) The initial frame (the size of cube: a=b=c=274.158 Å); (f) The end frame (the size of cube: a=b=c=58.8030 Å, with a properly amplification).

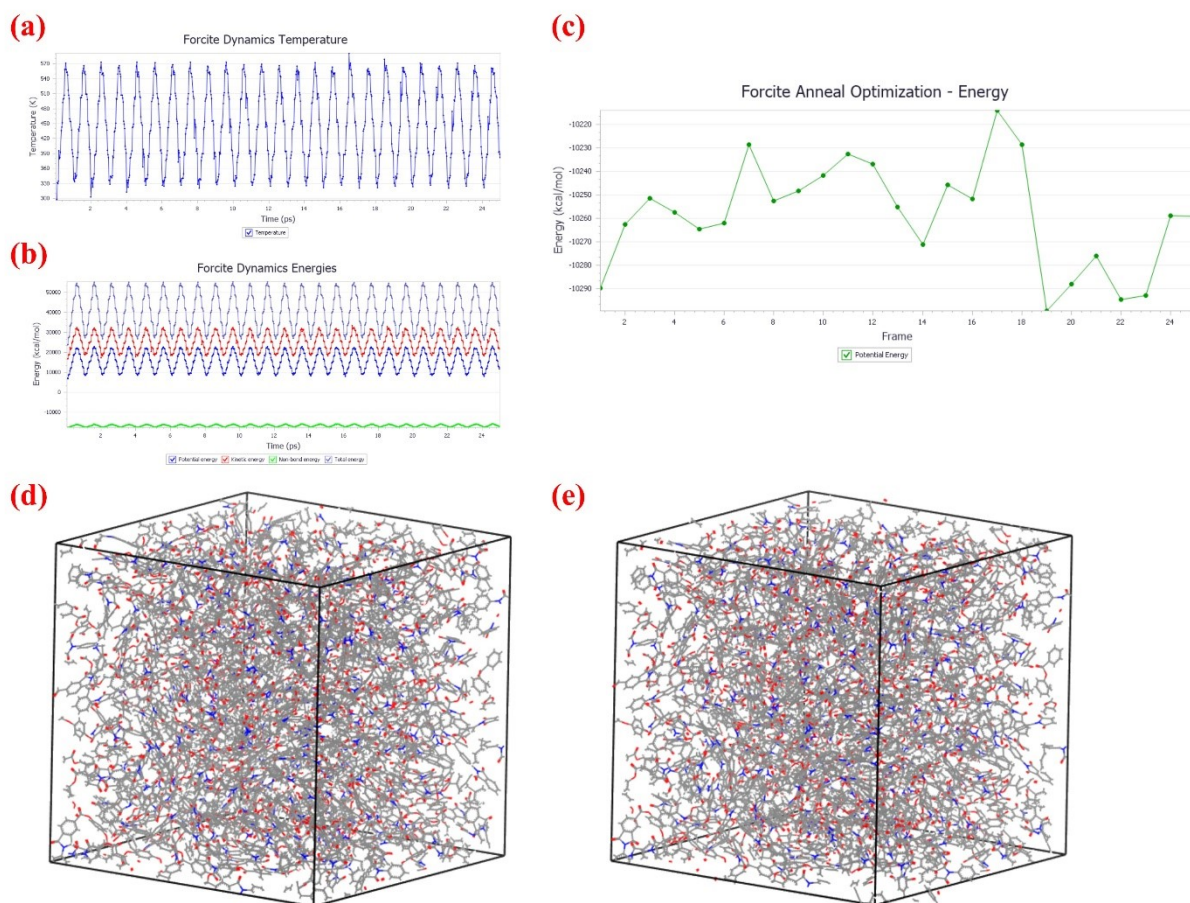

**Figure S10** The annealing process (NVT: 298 - 598 K, repeat 25 times) of EPI-3: (a) The dynamics temperature and (b) the dynamics density as functions of time, respectively; (c) The energies of 25 optimizations after annealing process; (d) The initial frame (the size of cube:  $a=b=c=58.8030 \text{ \AA}$ ); (e) The frame with the lowest energy (the size of cube:  $a=b=c=58.8030 \text{ \AA}$ ).

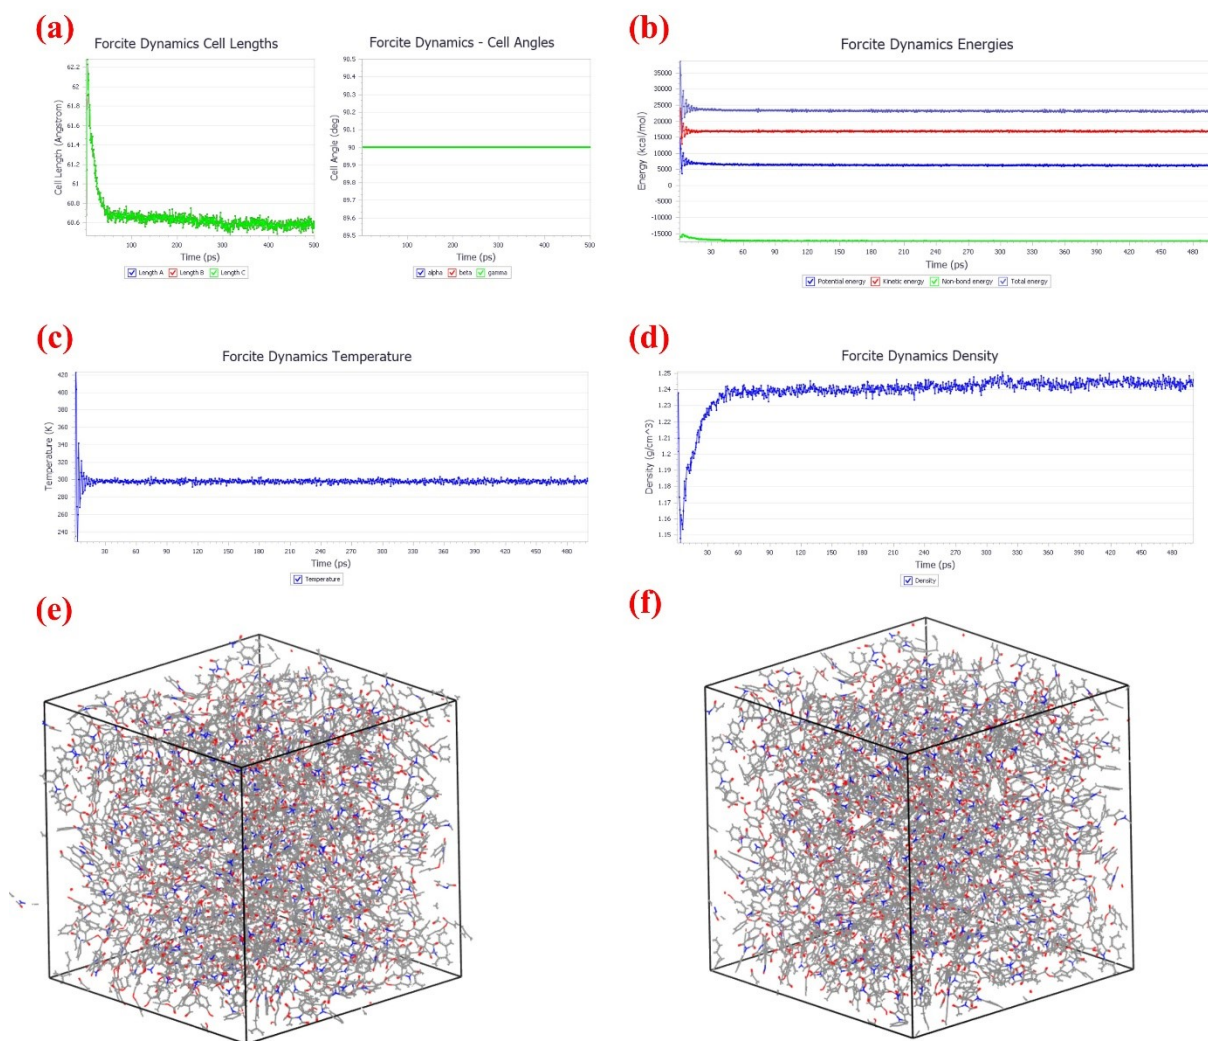

**Figure S11** The release process (NPT: 10<sup>-4</sup> GPa, 500 ps) of EPI-3: (a) The cell lengths and angles (b) the dynamics energies (c) the dynamics temperature and (d) the dynamics density as functions of time, respectively; (e) The initial frame (the size of cube: a=b=c=58.8030 Å); (f) The end frame (the size of cube: a=b=c=60.5495 Å).

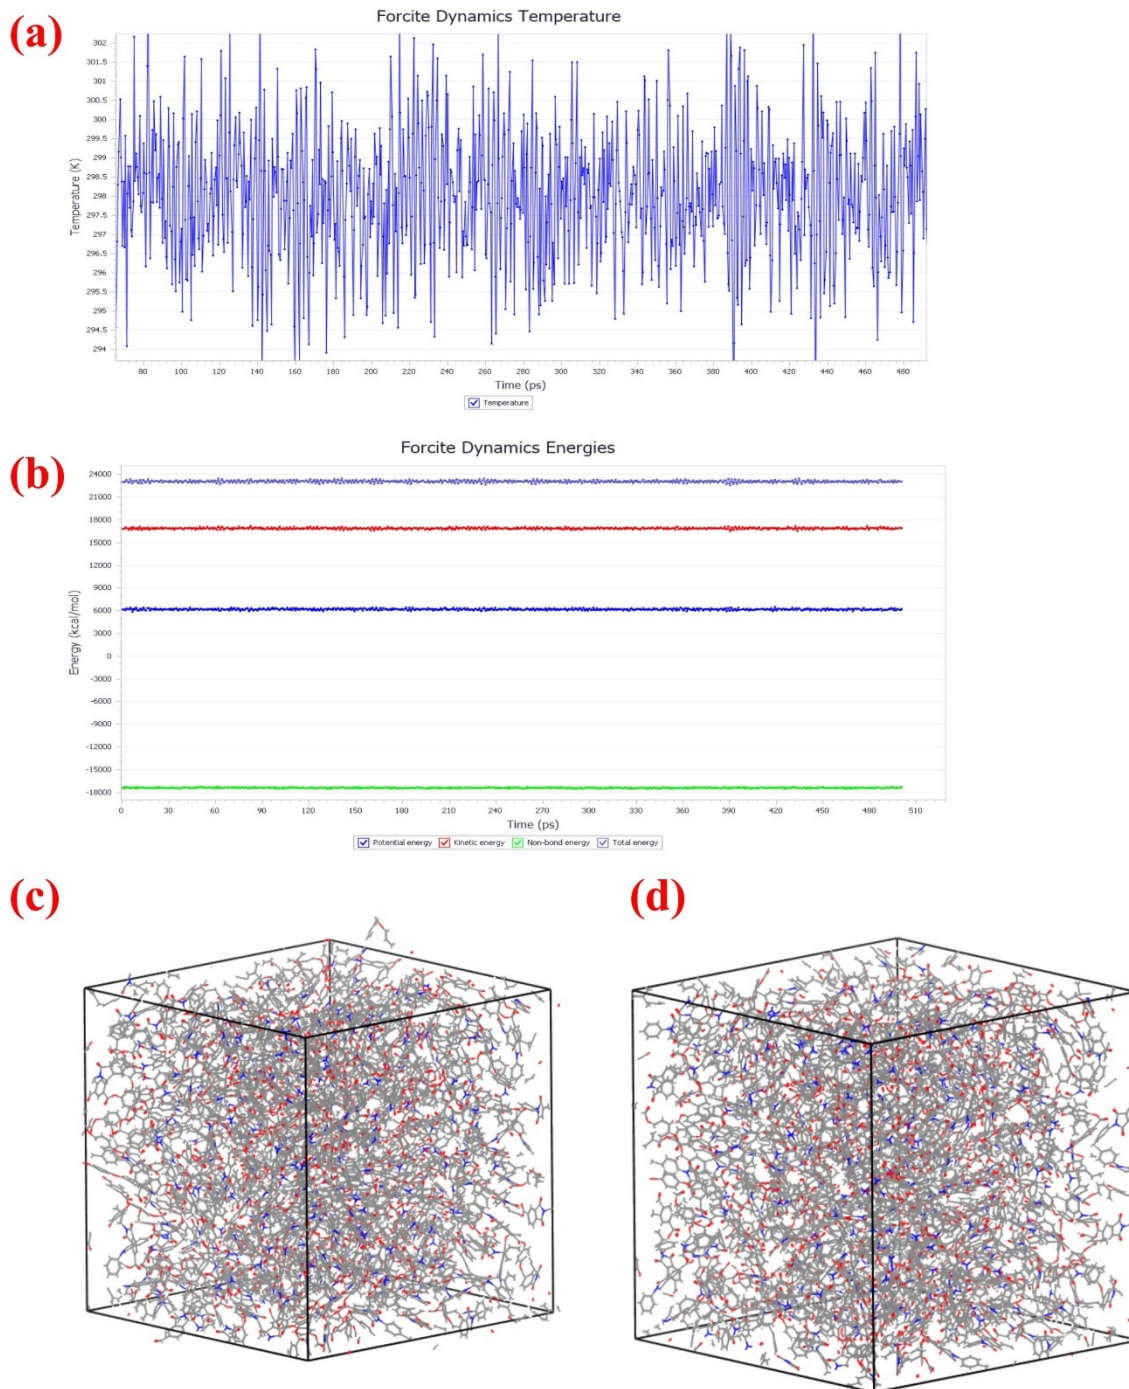

**Figure S12** The equilibrium process (NVT, 500 ps) of EPI-3: (a) The dynamics temperature and (b) the dynamics energies as functions of time, respectively; (c) The initial frame (the size of cube:  $a=b=c=60.5495 \text{ \AA}$ ); (d) The end frame (the size of cube:  $a=b=c=60.5495 \text{ \AA}$ ).

## Snapshots of molecular simulation process of EPI-4 (Figure S13 ~ Figure S16)

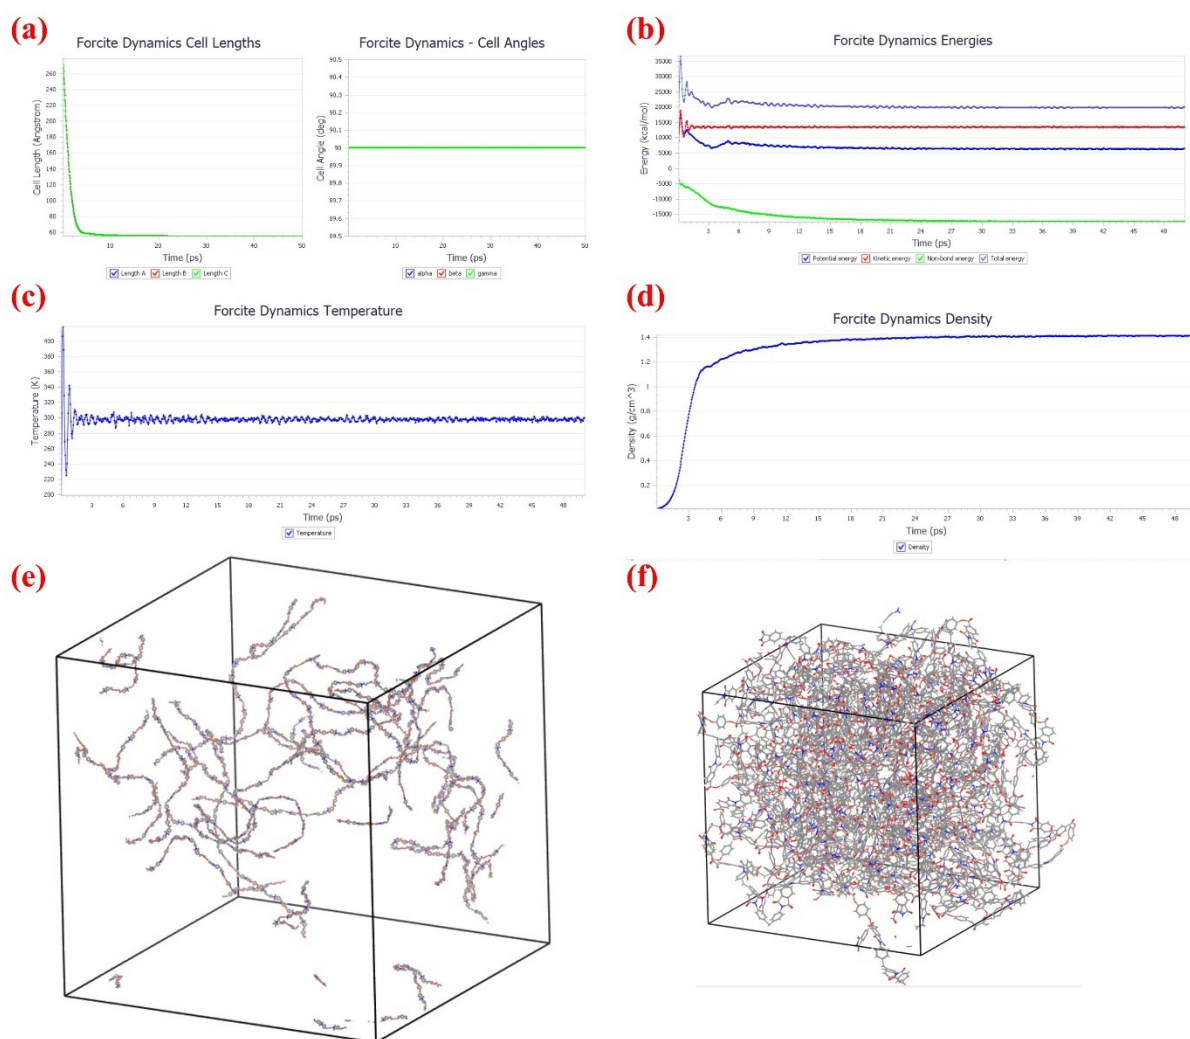

**Figure S13** The compress process (NPT: 0.5 GPa, 50 ps) of EPI-4: (a) The cell lengths and angles (b) the dynamics energies (c) the dynamics temperature and (d) the dynamics density as functions of time, respectively; (e) The initial frame (the size of cube:  $a=b=c=274.158 \text{ \AA}$ ); (f) The end frame (the size of cube:  $a=b=c=55.2112 \text{ \AA}$ , with a properly amplification).

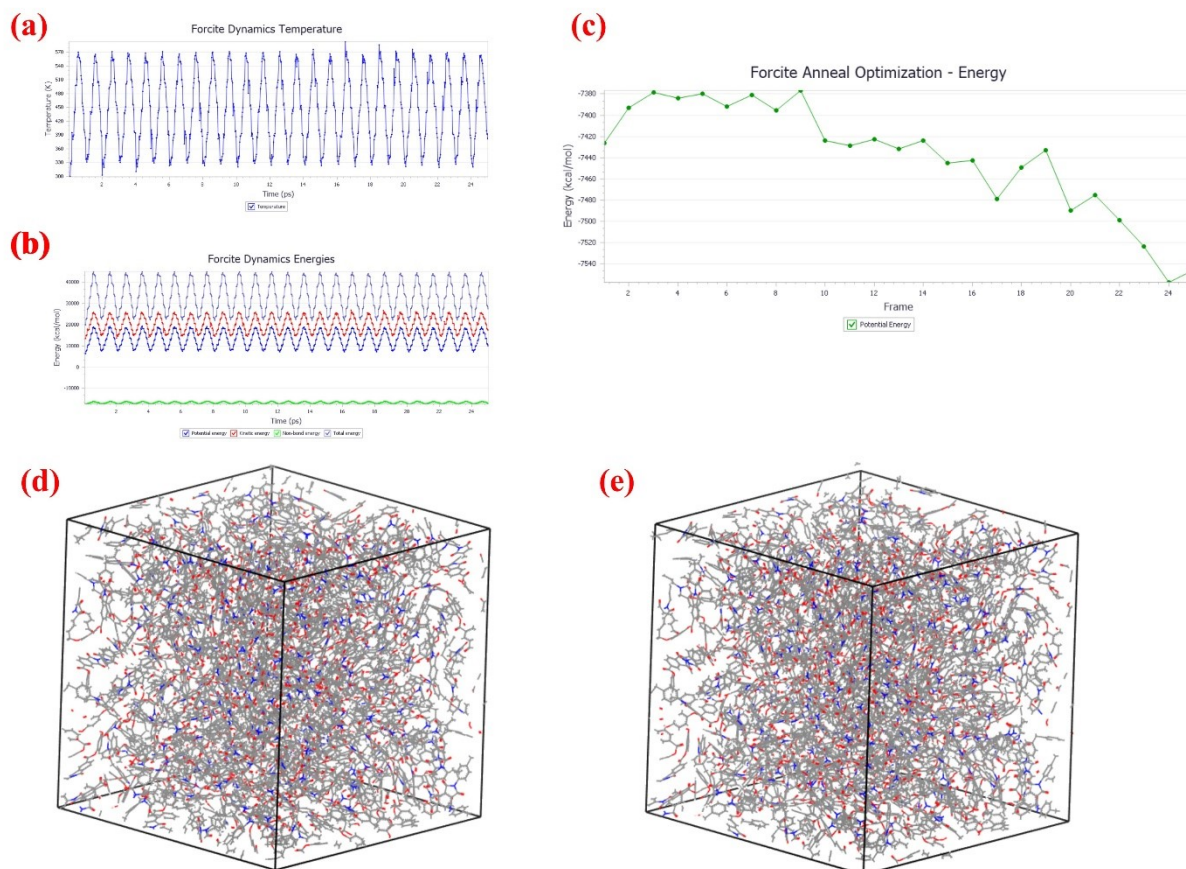

**Figure S14** The annealing process (NVT: 298 - 598 K, repeat 25 times) of EPI-4: (a) The dynamics temperature and (b) the dynamics density as functions of time, respectively; (c) The energies of 25 optimizations after annealing process; (d) The initial frame (the size of cube:  $a=b=c=55.2112 \text{ \AA}$ ); (e) The frame with the lowest energy (the size of cube:  $a=b=c=55.2112 \text{ \AA}$ ).

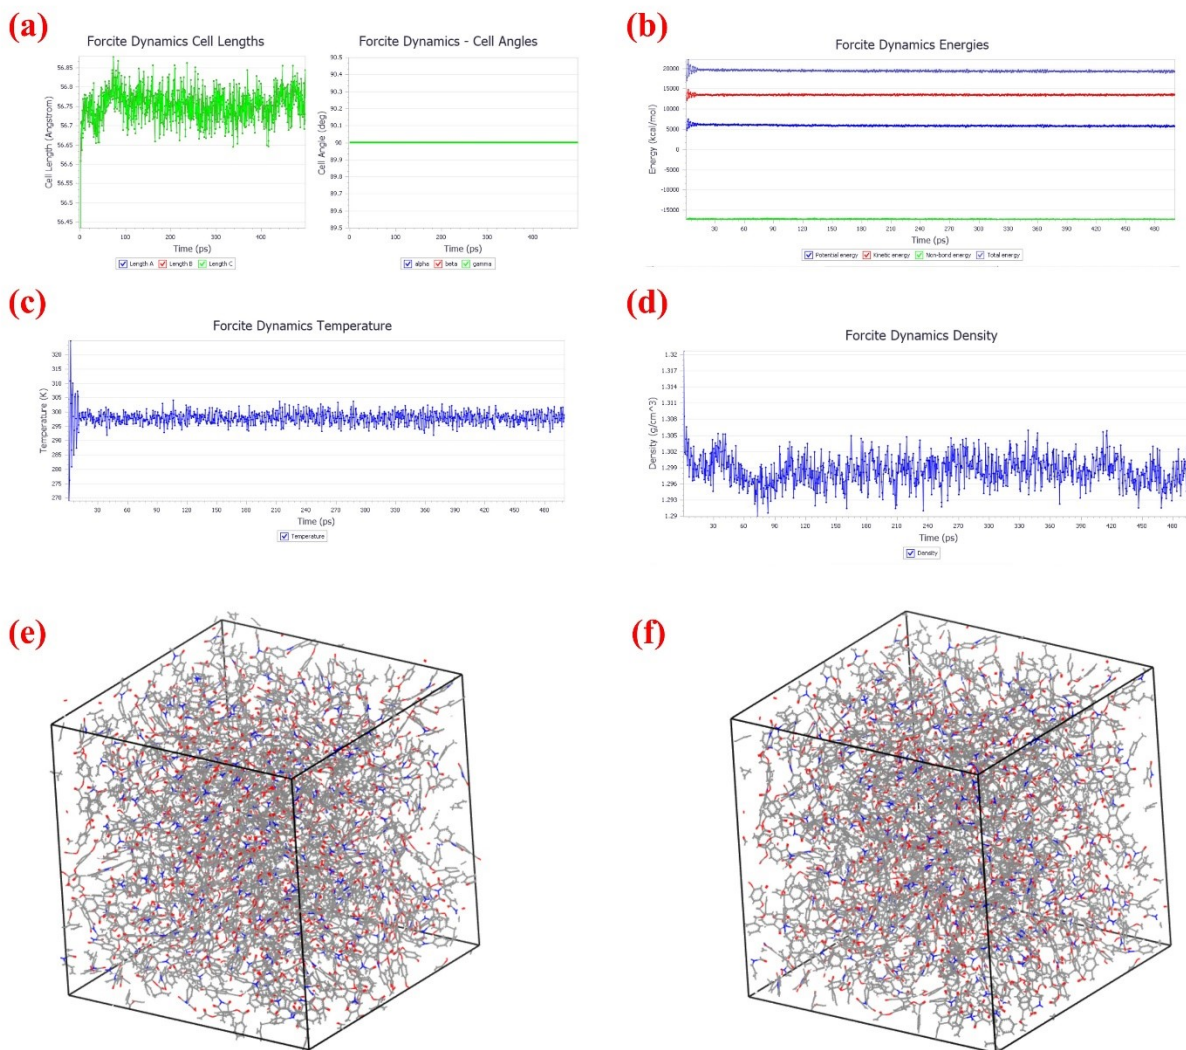

**Figure S15** The release process (NPT: 10<sup>-4</sup> GPa, 500 ps) of EPI-4: (a) The cell lengths and angles (b) the dynamics energies (c) the dynamics temperature and (d) the dynamics density as functions of time, respectively; (e) The initial frame (the size of cube: a=b=c=55.2112 Å); (f) The end frame (the size of cube: a=b=c=56.7748 Å).



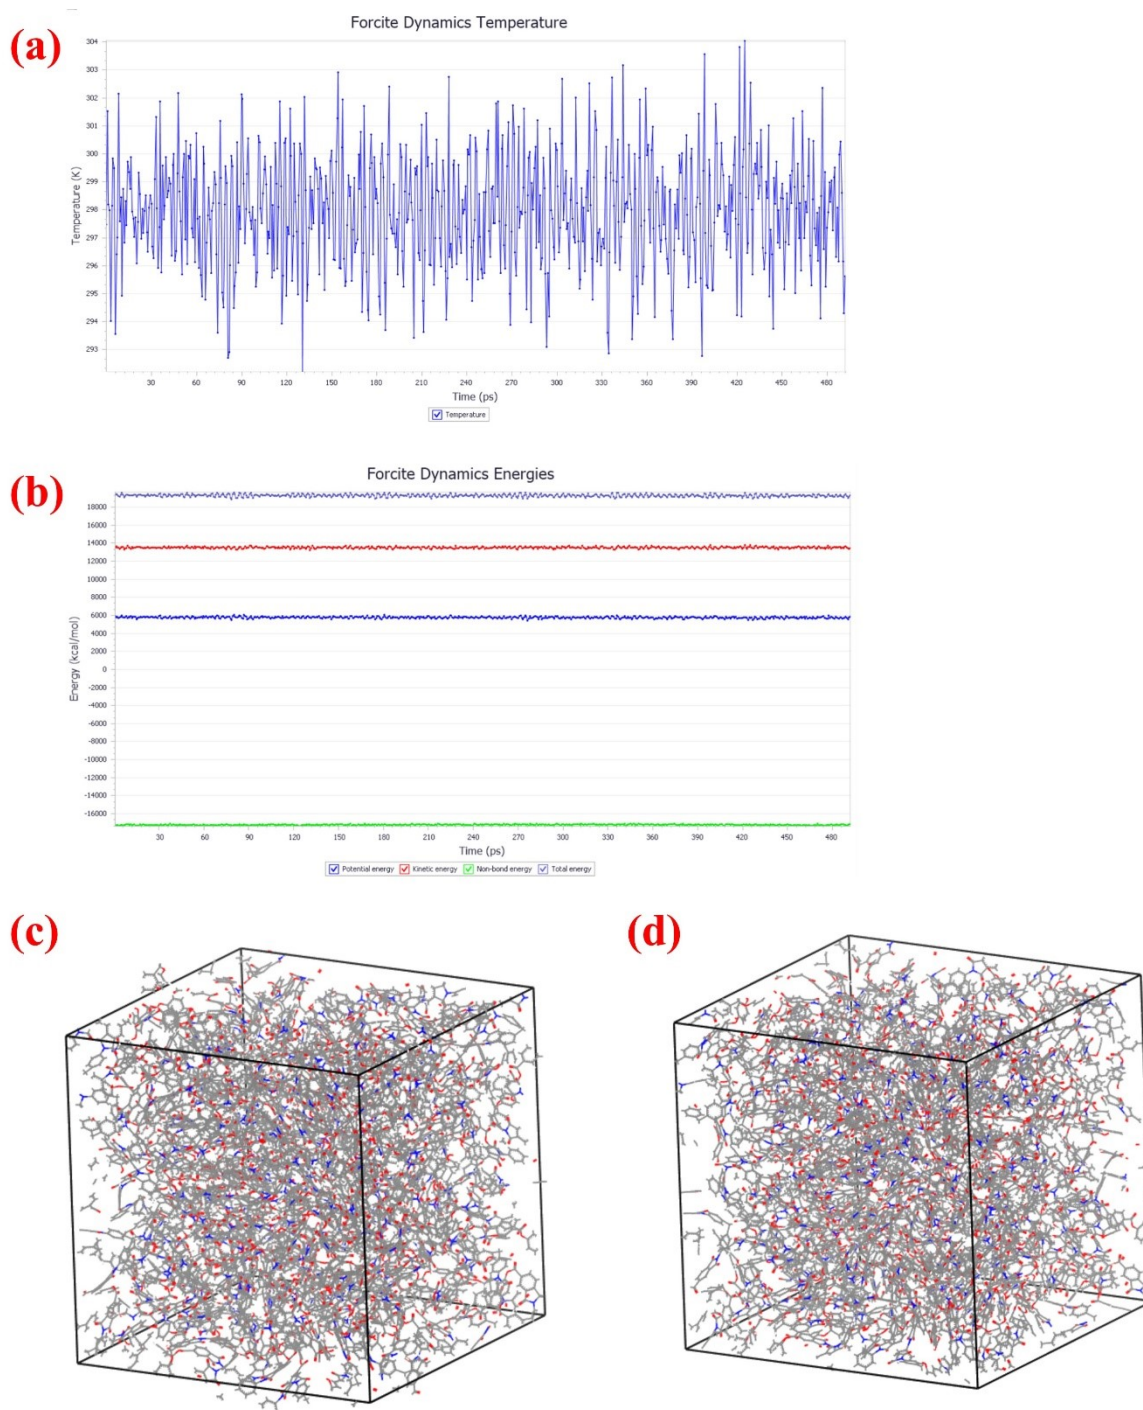

**Figure S16** The equilibrium process of EPI-4: (a) The dynamics temperature and (b) the dynamics energies as functions of time, respectively; (c) The initial frame (the size of cube:  $a=b=c=56.7748 \text{ \AA}$ ); (d) The end frame (the size of cube:  $a=b=c=56.7748 \text{ \AA}$ ).

## Snapshots of molecular simulation process of EPI-5 (Figure S17 ~ Figure S20)

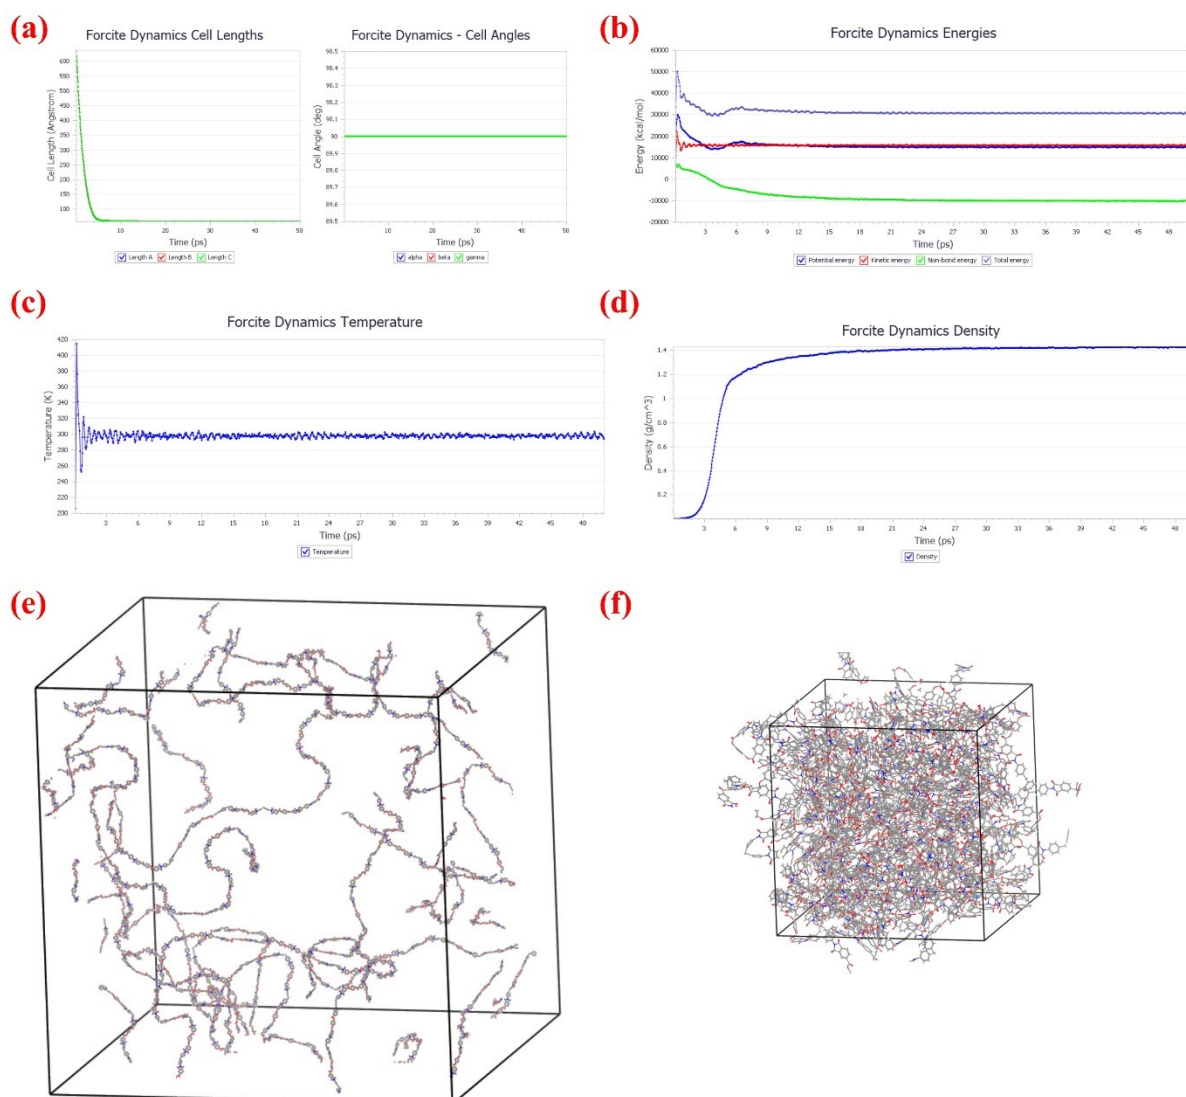

**Figure S17** The compress process (NPT: 0.5 GPa, 50 ps) of EPI-5: (a) The cell lengths and angles (b) the dynamics energies (c) the dynamics temperature and (d) the dynamics density as functions of time, respectively; (e) The initial frame (the size of cube:  $a=b=c=274.158 \text{ \AA}$ ); (f) The end frame (the size of cube:  $a=b=c=58.3726 \text{ \AA}$ , with a properly amplification).

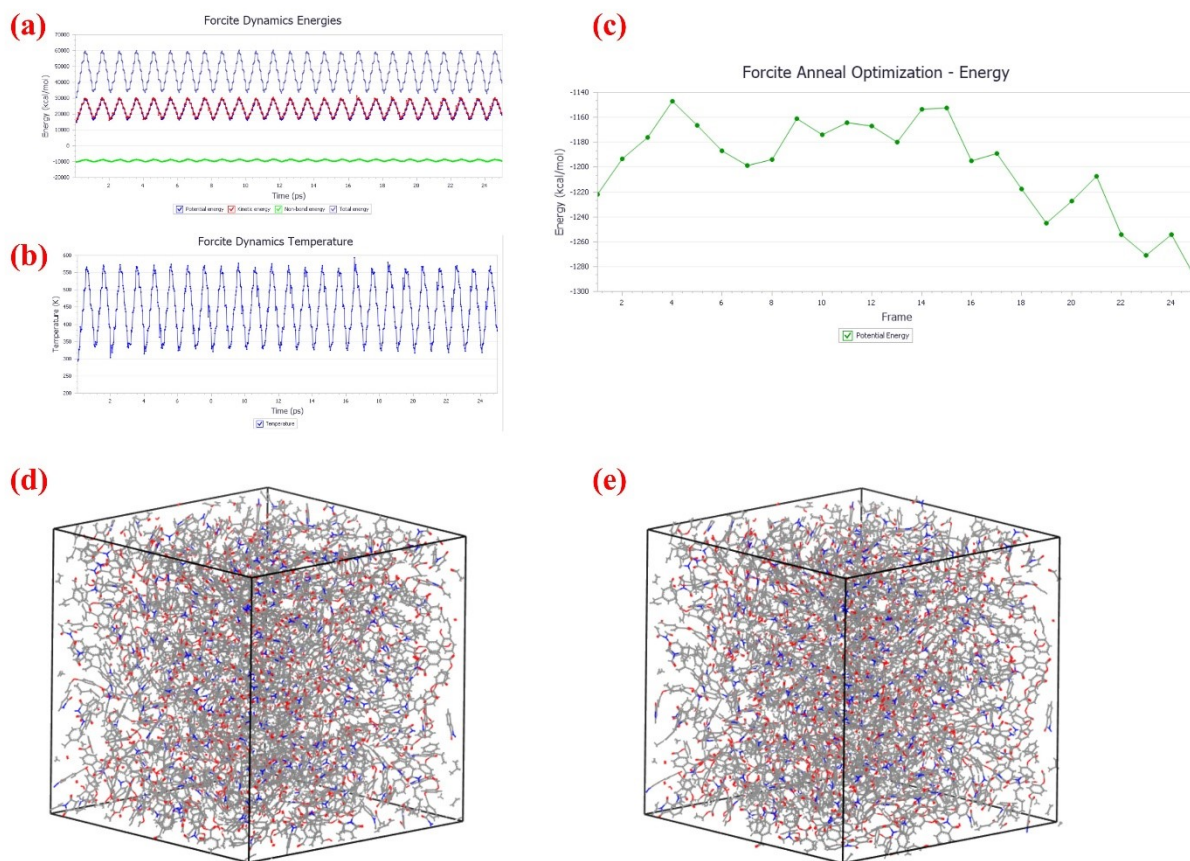

**Figure S18** The annealing process (NVT: 298 - 598 K, repeat 25 times) of EPI-5: (a) The dynamics temperature and (b) the dynamics density as functions of time, respectively; (c) The energies of 25 optimizations after annealing process; (d) The initial frame (the size of cube:  $a=b=c=58.3726 \text{ \AA}$ ); (e) The frame with the lowest energy (the size of cube:  $a=b=c=58.3726 \text{ \AA}$ ).

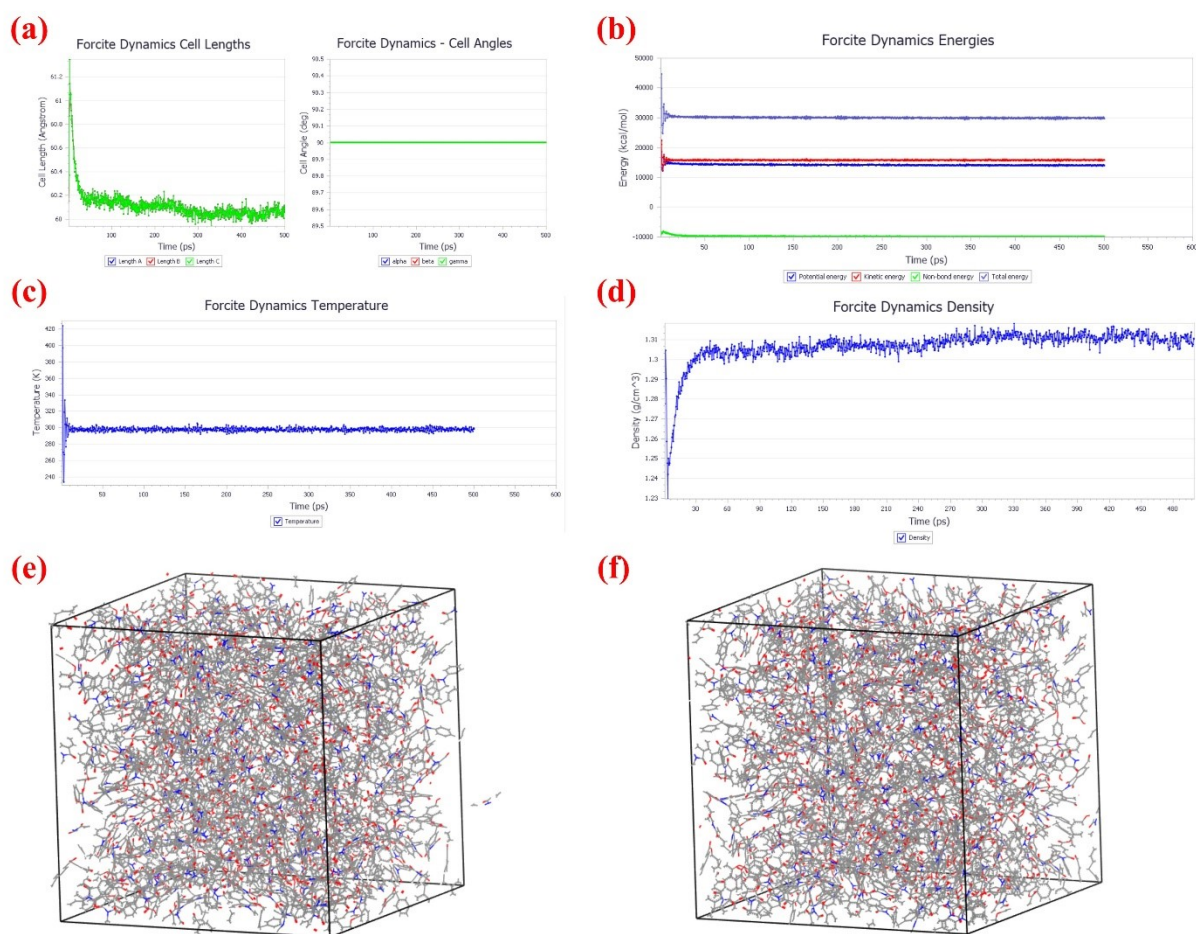

**Figure S19** The release process (NPT: 10<sup>-4</sup> GPa, 500 ps) of EPI-5: (a) The cell lengths and angles (b) the dynamics energies (c) the dynamics temperature and (d) the dynamics density as functions of time, respectively; (e) The initial frame (the size of cube: a=b=c=58.3726 Å); (f) The end frame (the size of cube: a=b=c=60.0594 Å).

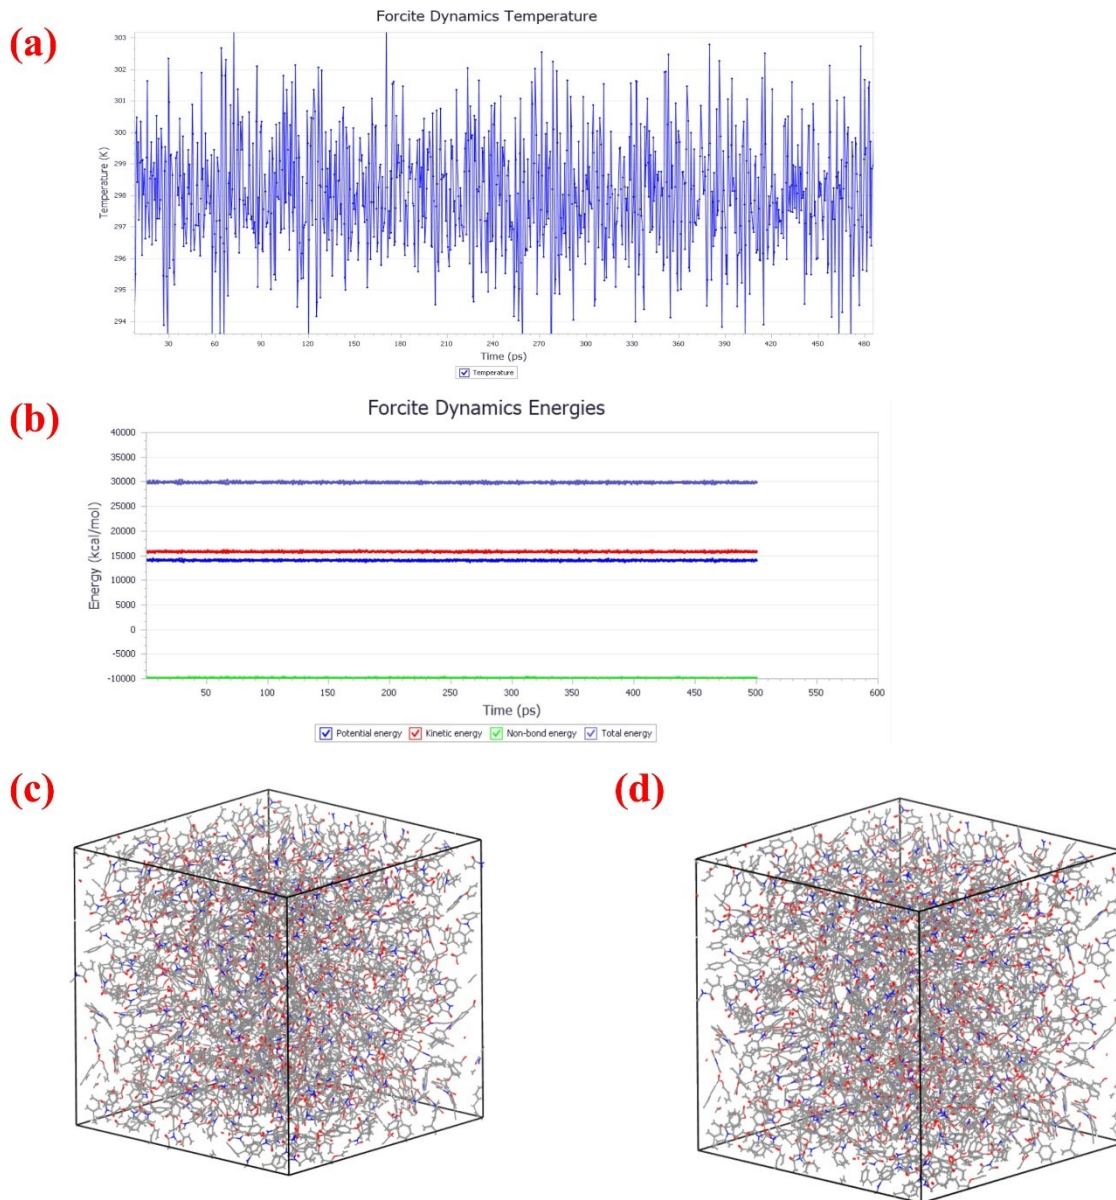

**Figure S20** The equilibrium process (NVT, 500 ps) of EPI-5: (a) The dynamics temperature and (b) the dynamics energies as functions of time, respectively; (c) The initial frame (the size of cube:  $a=b=c=60.0594 \text{ \AA}$ ); (d) The end frame (the size of cube:  $a=b=c=60.0594 \text{ \AA}$ ).

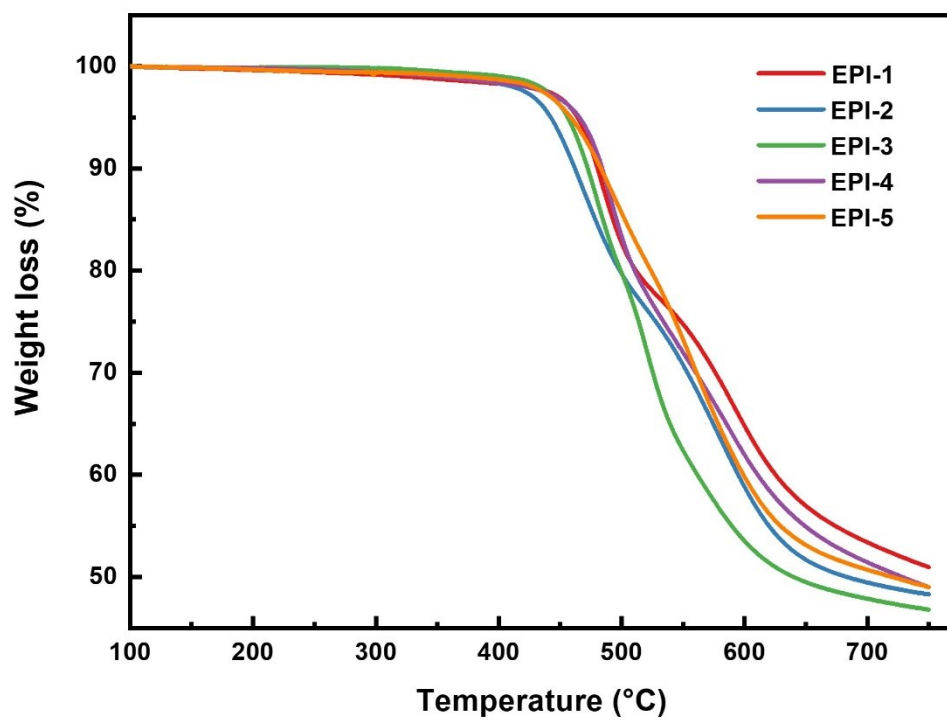

**Figure S21** TGA curves (N<sub>2</sub> atmosphere) of ester-containing polyimides

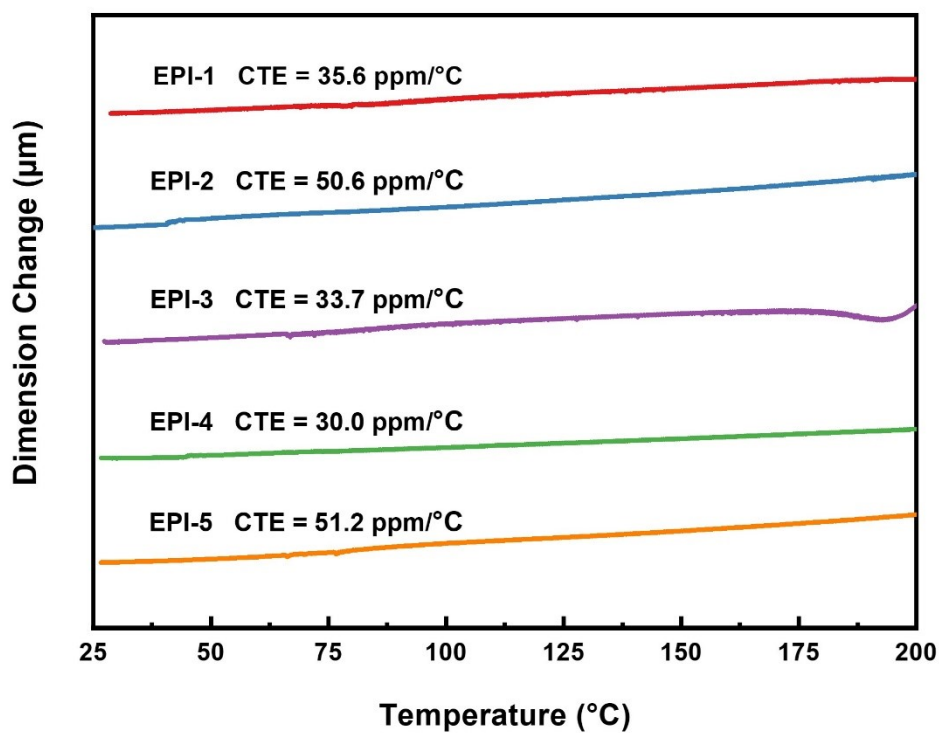

**Figure S22** TMA curves of ester-containing polyimides

**Table S1** thermal properties of ester-containing polyimides

| polyimides | T <sub>5%</sub><br>(°C) | CTE<br>(ppm/°C) | T <sub>g</sub><br>(°C) |
|------------|-------------------------|-----------------|------------------------|
| EPI-1      | 464                     | 35.58           | 316                    |
| EPI-2      | 442                     | 50.63           | 338                    |
| EPI-3      | 456                     | 33.72           | 200                    |
| EPI-4      | 465                     | 29.98           | 246                    |
| EPI-5      | 458                     | 51.18           | 247                    |

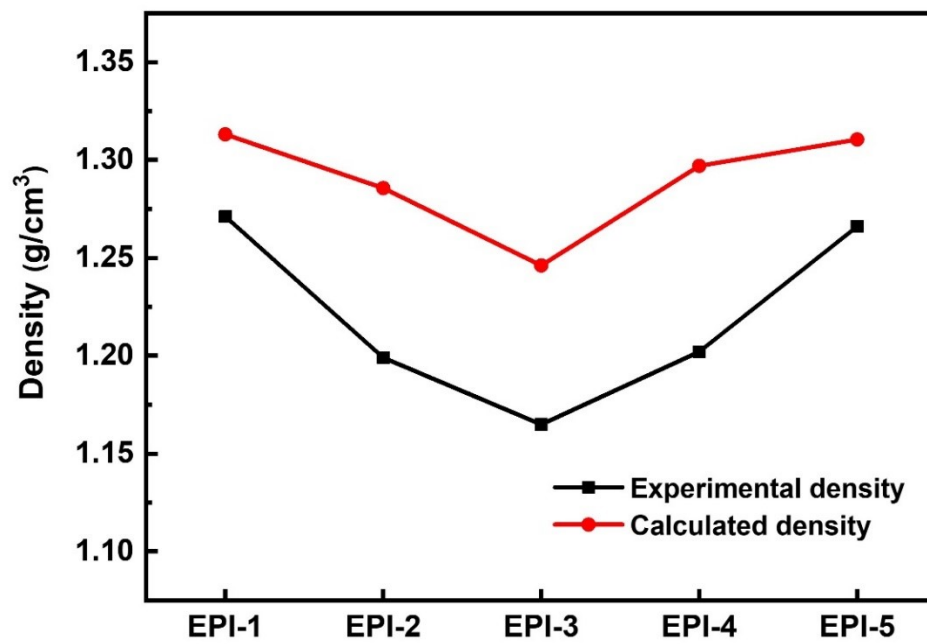

**Figure S23** The density of EPIs from both experimentation and calculation.
